# Supplementary material for: Governance of IT Service Procurement: Relationship vs Network based Approach
Source: Royal Society of Chemistry journal article supplement (doi:10.1039/c9cp02120e), 2013-01-01
Supplement: c9cp02120e1.pdf [file c9cp02120e1.pdf]

# Photodissociation Dynamics and the Dissociation Energy of Vanadium Monoxide, VO, Investigated using Velocity Map Imaging

Alexander S. Gentleman, Andreas Iskra, Hansjochen Köckert and Stuart R Mackenzie\*

Department of Chemistry, Physical and Theoretical Chemistry Laboratory, South Parks  
Road, Oxford, OX1 3QZ, United Kingdom

**Supporting Information**

## A. Identification of the dissociation co-fragment

For two-body photodissociation at the  $n$  photon level of the diatomic molecule VX conservation of energy requires:

$$E_{VX} + nh\nu = D_0(V - X) + E_V + E_X + TKER \quad (1)$$

where  $E_{VX}$ ,  $E_V$ , and  $E_X$  are the internal energies of the parent VX molecule, the V atom photofragment, and the co-fragment, X, respectively.  $D_0(V-X)$  is the ground state dissociation energy of VX, and  $TKER$  is the total kinetic energy release. Conservation of momentum requires allows the  $TKER$  in Equation 1 to be expressed in terms of the V fragment  $KER$

$$TKER = KER(V) \times \left(1 + \frac{m_V}{m_X}\right). \quad (2)$$

Substitution of Equation 2 into Equation 1, followed by re-arrangement, yields the following expression for  $KER(V)$ :

$$KER(V) = h\nu \times \left(\frac{n}{1 + m_V/m_X}\right) - \frac{k}{1 + m_V/m_X}. \quad (3)$$

Hence a plot of  $KER(V)$  versus photon energy,  $h\nu$ , is a linear function with a slope of  $n/(1+m_V/m_X)$  allowing the number of photons involved in a photofragmentation process and the identity of the co-fragment X can be determined. A plot of all measured V atom  $KER$ s in the photon energy range 19912–20072  $\text{cm}^{-1}$  is shown in Figure 1 (top). A linear fit to the measured  $KER$  values gives a slope of  $0.716 \pm 0.061$ .

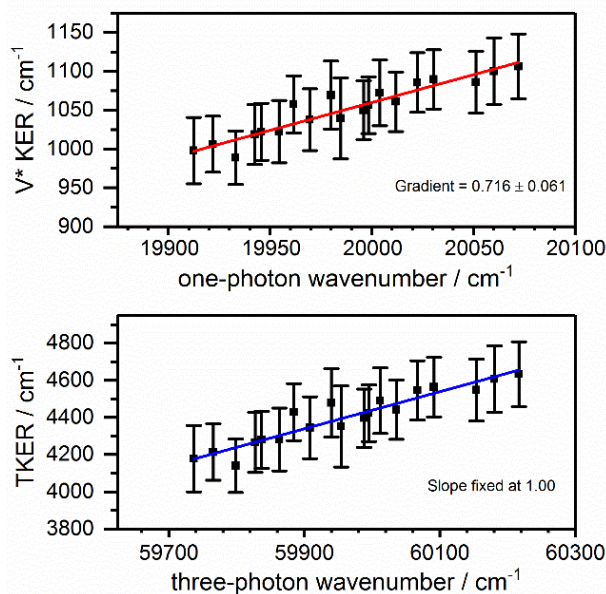

**Figure S1.** *Top:* Vanadium atom kinetic energy release (KER) as a function of one-photon energy between 19912-20072  $\text{cm}^{-1}$ . A linear function fitted to the experimental data gives a gradient of  $0.716 \pm 0.061$  sufficient to identify the co-fragment at an O-atom. *Bottom:* TKER plotted against three-photon wavenumber assuming V + O cofragments. The slope of the fitted linear function is fixed at 1, yielding an  $x$ -intercept of  $55560 \pm 170 \text{ cm}^{-1}$ . The error bars in both datasets correspond to the Full-Width-Half-Maximum (FWHM) of each fitted Gaussian used to identify the centre of each peak.

Table S1 lists possible a range of plausible co-fragment candidates with the corresponding number of photons required to dissociate the parent molecule. Given that an integer number of photons must be involved, the most likely co-fragment is oxygen, justified further by the fact that VO is the only molecular species observed in the molecular beam.

**Table S1.** List of potential co-fragment candidates;  $n$  refers to the number of photons needed to dissociate the parent species. The oxygen co-fragment gives the required number of photons closest to an integer value. Errors in  $n$  arise from the uncertainty (standard deviation) in the gradient of the fitted-line using linear regression.

| Slope             | Co-fragment (X) | Number of photons ( $n$ ) |
|-------------------|-----------------|---------------------------|
| $0.716 \pm 0.061$ | V               | $1.432 \pm 0.122$         |
|                   | V <sub>2</sub>  | $1.074 \pm 0.092$         |
|                   | C               | $3.759 \pm 0.321$         |
|                   | N               | $3.324 \pm 0.284$         |
|                   | O               | $2.998 \pm 0.256$         |
|                   | He              | $18.9751.622$             |

## B. Best determination of the VO dissociation energy

The  $V^* a^2G + O^3P$  channel is confidently assigned in several images recorded *via*  $C^4\Sigma^-$  ( $v' = 5, 6, 7$ ) allowing precise extrapolation to  $\text{TKER} = 0$  under the assumption of dissociation the three-photon level. This, in turn, provides a best estimate of the VO experimental dissociation energy of  $53126 \pm 263 \text{ cm}^{-1}$ .

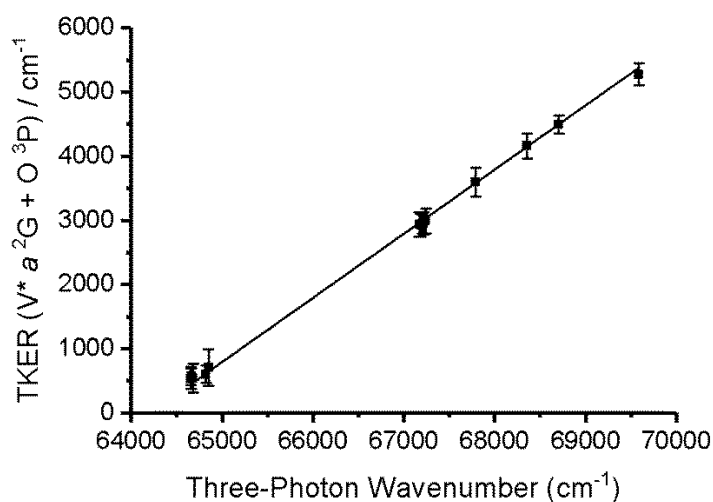

**Figure S2:** Extrapolation of the TKER in the  $V^* a^2G + O^3P$  channel as a function of total excitation wavenumber. The excellent fit to a straight line with slope fixed at unity ( $R^2 = 0.998$ ) allows extrapolation to an  $x$ -intercept of  $64212 \pm 18 \text{ cm}^{-1}$ . Observation of the same channel in images across the region (including to low TKER) provides the best estimate of the VO dissociation energy ( $53126 \pm 263 \text{ cm}^{-1}$ ) in this study.

### C. Calculation of $D_0(\text{VO}^+)$ and Comparison to Literature Values

Table S2 compares the bond energy of  $\text{VO}^+$  determined from this study with various previously-determined experimental and theoretical values. The value determined in this work was calculated via a thermodynamic cycle involving the most precise values for the ionisation energies of V and VO (termed  $IE(\text{V})$  and  $IE(\text{VO})$ , respectively), and the  $D_0(\text{VO})$  determined from the VMI work presented.

**Table S2.** Experimental and theoretical literature values of the ground state dissociation energy of  $\text{VO}^+$ ,  $D_0(\text{VO}^+)$ .

| Author                                 | $D_0$                                                                                                                                                                  | Method                                                                                 | Year |
|----------------------------------------|------------------------------------------------------------------------------------------------------------------------------------------------------------------------|----------------------------------------------------------------------------------------|------|
| Aristov and Armentrout. <sup>1</sup>   | $131 \pm 5 \text{ kcal mol}^{-1}$<br>$45800 \pm 2000 \text{ cm}^{-1}$<br>( $5.68 \pm 0.22 \text{ eV}$ )                                                                | Guided Ion Beam Mass Spectrometry                                                      | 1984 |
| Dyke <i>et al.</i> <sup>2</sup>        | $48200 \pm 807 \text{ cm}^{-1}$<br>( $5.98 \pm 0.10 \text{ eV}$ )                                                                                                      | High-Temperature Photoelectron Spectroscopy                                            | 1985 |
| Arisov and Armentrout. <sup>3</sup>    | $48400 \pm 2820 \text{ cm}^{-1}$<br>( $6.00 \pm 0.35 \text{ eV}$ )                                                                                                     | Collision-Induced Dissociation                                                         | 1986 |
| Fisher <i>et al.</i> <sup>4</sup>      | $48400 \pm 807 \text{ cm}^{-1}$<br>( $6.00 \pm 0.10 \text{ eV}$ )                                                                                                      | Thermodynamic Cycle <i>via</i> $IE(\text{VO})$ , $IE(\text{M})$ , and $D_0(\text{VO})$ | 1990 |
| Clemmer <i>et al.</i> <sup>5</sup>     | $46900 \pm 1370 \text{ cm}^{-1}$<br>( $5.81 \pm 0.17 \text{ eV}$ )                                                                                                     | Guided Ion Beam Mass Spectrometry                                                      | 1991 |
| Carter and Goddard III. <sup>6</sup>   | $128.3 \text{ kcal mol}^{-1}$<br>$44870 \text{ cm}^{-1}$<br>( $5.56 \text{ eV}$ )                                                                                      | All-electron <i>ab initio</i> GVBCI-SCF                                                | 1988 |
| Broclawik. <sup>7</sup>                | $D_e = 55000 \text{ cm}^{-1}$<br>( $D_e = 6.82 \text{ eV}$ )                                                                                                           | LCGTO Spin-Polarised DFT                                                               | 1995 |
| Kretzschmar <i>et al.</i> <sup>8</sup> | $43800 \text{ cm}^{-1}$<br>( $5.43 \text{ eV}$ )<br>$46000 \text{ cm}^{-1}$<br>( $5.71 \text{ eV}$ )                                                                   | MCSCF and MR-ACPF                                                                      | 1998 |
| Nakao <i>et al.</i> <sup>9</sup>       | $129.2 \text{ kcal mol}^{-1}$<br>$45190 \text{ cm}^{-1}$<br>( $5.60 \text{ eV}$ )<br>$128.2 \text{ kcal mol}^{-1}$<br>$44840 \text{ cm}^{-1}$<br>( $5.56 \text{ eV}$ ) | SA-CASSCF and B3LYP                                                                    | 2001 |
| This work                              | $49158 \pm 263 \text{ cm}^{-1}$                                                                                                                                        | VMI                                                                                    | 2019 |

## References

1. N. Aristov and P. B. Armentrout, *J Am Chem Soc*, 1984, **106**, 4065-4066.
2. J. M. Dyke, B. W. J. Gravenor, M. P. Hastings and A. Morris, *J Phys Chem-Us*, 1985, **89**, 4613-4617.
3. N. Aristov and P. B. Armentrout, *J Phys Chem-Us*, 1986, **90**, 5135-5140.
4. E. R. Fisher, J. L. Elkind, D. E. Clemmer, R. Georgiadis, S. K. Loh, N. Aristov, L. S. Sunderlin and P. B. Armentrout, *J Chem Phys*, 1990, **93**, 2676-2691.
5. D. E. Clemmer, J. L. Elkind, N. Aristov and P. B. Armentrout, *J Chem Phys*, 1991, **95**, 3387-3393.
6. E. A. Carter and W. A. Goddard, *J Phys Chem-Us*, 1988, **92**, 2109-2115.
7. E. Broclawik, *Int J Quantum Chem*, 1995, **56**, 779-785.
8. I. Kretzschmar, D. Schroder, H. Schwarz, C. Rue and P. B. Armentrout, *J Phys Chem A*, 1998, **102**, 10060-10073.
9. Y. Nakao, K. Hirao and T. Taketsugu, *J Chem Phys*, 2001, **114**, 7935-7940.
